# Supplementary material for: Only peak thyroglobulin concentration on day 1 and 3 of rhTSH-aided RAI adjuvant treatment has prognostic implications in differentiated thyroid cancer
Source: Springer Nature journal article supplement (doi:10.1007/s12149-021-01663-y), 2021-08-07

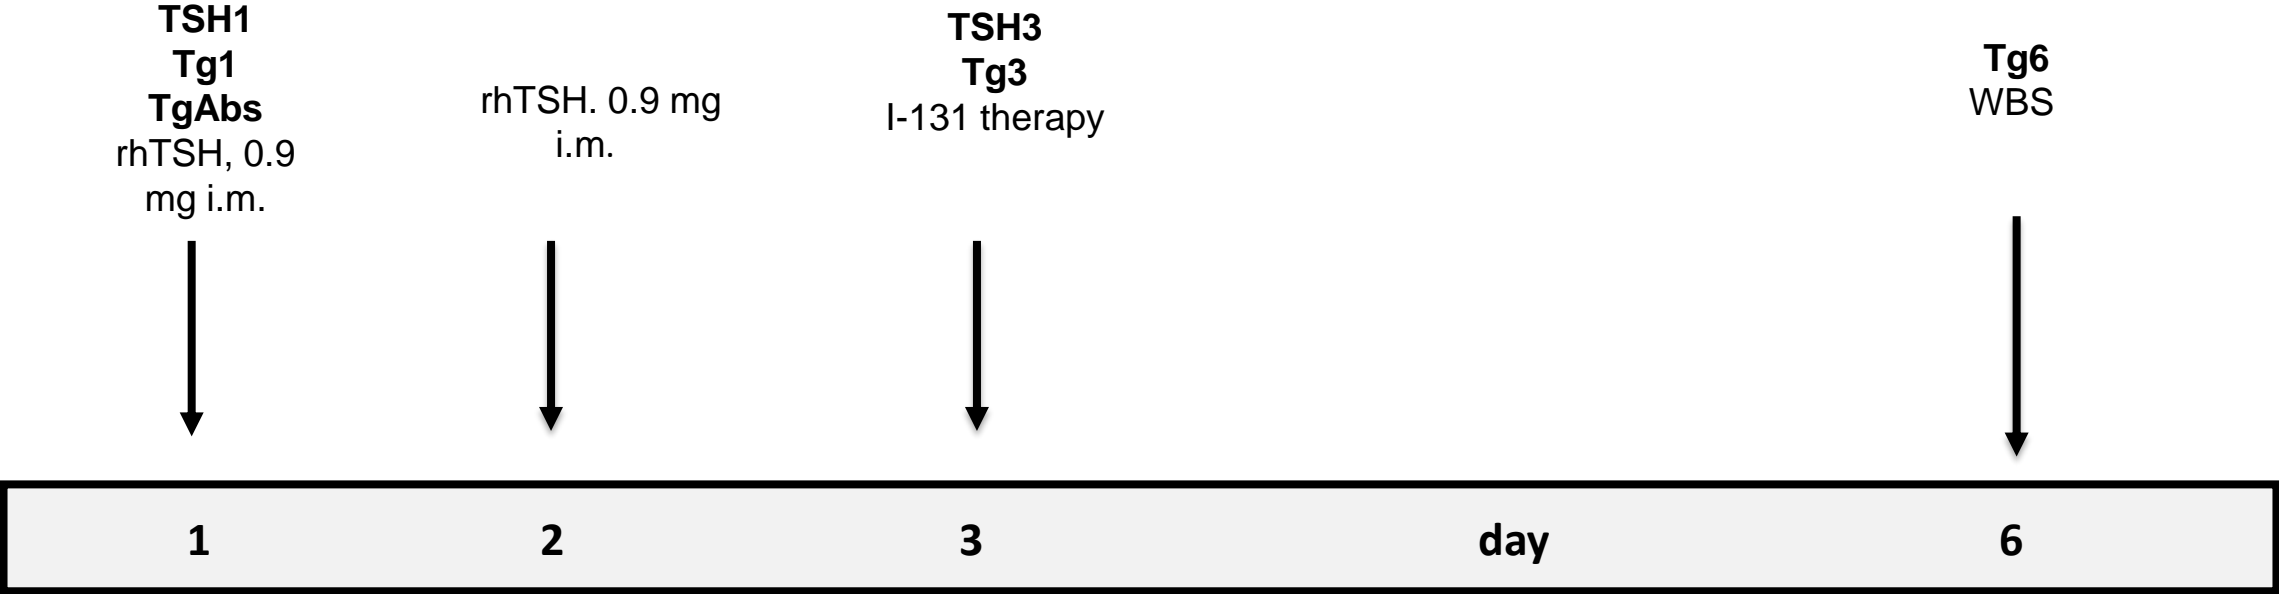

Supplement: MOESM1 [file 19550768]
